# Supplementary material for: Effects of different concentrations of human umbilical cord mesenchymal stem cells to ameliorate psoriasis-like skin lesions in BALB/c mice
Source: PubMed Central journal article supplement — Ann Transl Med. 2022 Jan;10(2):86. doi: 10.21037/atm-22-4 (PMC8848403; doi:10.21037/atm-22-4), 2022-01
Supplement: atm-10-02-86-coif.pdf [file atm-10-02-86-coif.pdf]

## ICMJE DISCLOSURE FORM

Date: 2021/12/30

Your Name: Youshu Lin

Manuscript Title: Effects of different concentrations of human umbilical cord mesenchymal stem cells to relieve psoriasis-like skin lesions in BALB/c mice

Manuscript number (if known): \_\_\_\_\_

In the interest of transparency, we ask you to disclose all relationships/activities/interests listed below that are related to the content of your manuscript. "Related" means any relation with for-profit or not-for-profit third parties whose interests may be affected by the content of the manuscript. Disclosure represents a commitment to transparency and does not necessarily indicate a bias. If you are in doubt about whether to list a relationship/activity/interest, it is preferable that you do so.

The following questions apply to the author's relationships/activities/interests as they relate to the current manuscript only.

The author's relationships/activities/interests should be defined broadly. For example, if your manuscript pertains to the epidemiology of hypertension, you should declare all relationships with manufacturers of antihypertensive medication, even if that medication is not mentioned in the manuscript.

In item #1 below, report all support for the work reported in this manuscript without time limit. For all other items, the time frame for disclosure is the past 36 months.

|                                                           |                                                                                                                                                                                | Name all entities with whom you have this relationship or indicate none (add rows as needed) | Specifications/Comments (e.g., if payments were made to you or to your institution)                                                               |
|-----------------------------------------------------------|--------------------------------------------------------------------------------------------------------------------------------------------------------------------------------|----------------------------------------------------------------------------------------------|---------------------------------------------------------------------------------------------------------------------------------------------------|
| <b>Time frame: Since the initial planning of the work</b> |                                                                                                                                                                                |                                                                                              |                                                                                                                                                   |
| 1                                                         | All support for the present manuscript (e.g., funding, provision of study materials, medical writing, article processing charges, etc.)<br><b>No time limit for this item.</b> | Hainan Province Clinical Medical Center                                                      |                                                                                                                                                   |
|                                                           |                                                                                                                                                                                | Hainan Natural Science Foundation                                                            | Effects of indigo naturalis and Arnebia on differentiation and barrier function of epidermal stem cells in psoriasis response research (20158342) |
|                                                           |                                                                                                                                                                                |                                                                                              |                                                                                                                                                   |
|                                                           |                                                                                                                                                                                |                                                                                              |                                                                                                                                                   |
|                                                           |                                                                                                                                                                                |                                                                                              |                                                                                                                                                   |
|                                                           |                                                                                                                                                                                |                                                                                              |                                                                                                                                                   |
| <b>Time frame: past 36 months</b>                         |                                                                                                                                                                                |                                                                                              |                                                                                                                                                   |
| 2                                                         | Grants or contracts from any entity (if not indicated in item #1 above).                                                                                                       | None                                                                                         |                                                                                                                                                   |
|                                                           |                                                                                                                                                                                |                                                                                              |                                                                                                                                                   |
| 3                                                         | Royalties or licenses                                                                                                                                                          | None                                                                                         |                                                                                                                                                   |
|                                                           |                                                                                                                                                                                |                                                                                              |                                                                                                                                                   |

|    |                                                                                                              |            |  |
|----|--------------------------------------------------------------------------------------------------------------|------------|--|
| 4  | Consulting fees                                                                                              | _____ None |  |
| 5  | Payment or honoraria for lectures, presentations, speakers bureaus, manuscript writing or educational events | _____ None |  |
| 6  | Payment for expert testimony                                                                                 | _____ None |  |
| 7  | Support for attending meetings and/or travel                                                                 | _____ None |  |
| 8  | Patents planned, issued or pending                                                                           | _____ None |  |
| 9  | Participation on a Data Safety Monitoring Board or Advisory Board                                            | _____ None |  |
| 10 | Leadership or fiduciary role in other board, society, committee or advocacy group, paid or unpaid            | _____ None |  |
| 11 | Stock or stock options                                                                                       | _____ None |  |
| 12 | Receipt of equipment, materials, drugs, medical writing, gifts or other services                             | _____ None |  |
| 13 | Other financial or non-financial interests                                                                   | _____ None |  |

**Please summarize the above conflict of interest in the following box:**

The author reports that research was supported by Hainan Province Clinical Medical Center and the funding project “Effects of indigo naturalis and Arnebia on differentiation and barrier function of epidermal stem cells in psoriasis response research (Hainan Natural Science Foundation, 20158342)”.

**Please place an “X” next to the following statement to indicate your agreement:**

**X  I certify that I have answered every question and have not altered the wording of any of the questions on this form.**



## ICMJE DISCLOSURE FORM

Date: 2021/12/30

Your Name: Hongwei Wang

Manuscript Title: Effects of different concentrations of human umbilical cord mesenchymal stem cells to relieve psoriasis-like skin lesions in BALB/c mice

Manuscript number (if known): \_\_\_\_\_

In the interest of transparency, we ask you to disclose all relationships/activities/interests listed below that are related to the content of your manuscript. "Related" means any relation with for-profit or not-for-profit third parties whose interests may be affected by the content of the manuscript. Disclosure represents a commitment to transparency and does not necessarily indicate a bias. If you are in doubt about whether to list a relationship/activity/interest, it is preferable that you do so.

The following questions apply to the author's relationships/activities/interests as they relate to the current manuscript only.

The author's relationships/activities/interests should be defined broadly. For example, if your manuscript pertains to the epidemiology of hypertension, you should declare all relationships with manufacturers of antihypertensive medication, even if that medication is not mentioned in the manuscript.

In item #1 below, report all support for the work reported in this manuscript without time limit. For all other items, the time frame for disclosure is the past 36 months.

|                                                           |                                                                                                                                                                                | Name all entities with whom you have this relationship or indicate none (add rows as needed) | Specifications/Comments (e.g., if payments were made to you or to your institution)                                                               |
|-----------------------------------------------------------|--------------------------------------------------------------------------------------------------------------------------------------------------------------------------------|----------------------------------------------------------------------------------------------|---------------------------------------------------------------------------------------------------------------------------------------------------|
| <b>Time frame: Since the initial planning of the work</b> |                                                                                                                                                                                |                                                                                              |                                                                                                                                                   |
| 1                                                         | All support for the present manuscript (e.g., funding, provision of study materials, medical writing, article processing charges, etc.)<br><b>No time limit for this item.</b> | Hainan Province Clinical Medical Center                                                      |                                                                                                                                                   |
|                                                           |                                                                                                                                                                                | Hainan Natural Science Foundation                                                            | Effects of indigo naturalis and Arnebia on differentiation and barrier function of epidermal stem cells in psoriasis response research (20158342) |
|                                                           |                                                                                                                                                                                |                                                                                              |                                                                                                                                                   |
|                                                           |                                                                                                                                                                                |                                                                                              |                                                                                                                                                   |
|                                                           |                                                                                                                                                                                |                                                                                              |                                                                                                                                                   |
|                                                           |                                                                                                                                                                                |                                                                                              |                                                                                                                                                   |
| <b>Time frame: past 36 months</b>                         |                                                                                                                                                                                |                                                                                              |                                                                                                                                                   |
| 2                                                         | Grants or contracts from any entity (if not indicated in item #1 above).                                                                                                       | ___ None                                                                                     |                                                                                                                                                   |
|                                                           |                                                                                                                                                                                |                                                                                              |                                                                                                                                                   |
|                                                           |                                                                                                                                                                                |                                                                                              |                                                                                                                                                   |
| 3                                                         | Royalties or licenses                                                                                                                                                          | ___ None                                                                                     |                                                                                                                                                   |
|                                                           |                                                                                                                                                                                |                                                                                              |                                                                                                                                                   |
|                                                           |                                                                                                                                                                                |                                                                                              |                                                                                                                                                   |
| 4                                                         | Consulting fees                                                                                                                                                                | ___ None                                                                                     |                                                                                                                                                   |

|    |                                                                                                              |                                                     |  |
|----|--------------------------------------------------------------------------------------------------------------|-----------------------------------------------------|--|
|    |                                                                                                              |                                                     |  |
| 5  | Payment or honoraria for lectures, presentations, speakers bureaus, manuscript writing or educational events | <input type="checkbox"/> None                       |  |
| 6  | Payment for expert testimony                                                                                 | <input type="checkbox"/> None                       |  |
| 7  | Support for attending meetings and/or travel                                                                 | <input type="checkbox"/> None                       |  |
| 8  | Patents planned, issued or pending                                                                           | <input type="checkbox"/> None                       |  |
| 9  | Participation on a Data Safety Monitoring Board or Advisory Board                                            | <input type="checkbox"/> None                       |  |
| 10 | Leadership or fiduciary role in other board, society, committee or advocacy group, paid or unpaid            | <input type="checkbox"/> None                       |  |
| 11 | Stock or stock options                                                                                       | <input type="checkbox"/> None                       |  |
| 12 | Receipt of equipment, materials, drugs, medical writing, gifts or other services                             | <input type="checkbox"/> None                       |  |
| 13 | Other financial or non-financial interests                                                                   | Asia Stem Cell Regenerative Pharmaceutical Co. Ltd. |  |

**Please summarize the above conflict of interest in the following box:**

The author reports that research was supported by Hainan Province Clinical Medical Center and the funding project “Effects of indigo naturalis and Arnebia on differentiation and barrier function of epidermal stem cells in psoriasis response research (Hainan Natural Science Foundation, 20158342)”. The author is from Asia Stem Cell Regenerative Pharmaceutical Co. Ltd.

**Please place an “X” next to the following statement to indicate your agreement:**

**I certify that I have answered every question and have not altered the wording of any of the questions on this form.**

## ICMJE DISCLOSURE FORM

Date: 2021/12/30

Your Name: Cuibao Jiang

Manuscript Title: Effects of different concentrations of human umbilical cord mesenchymal stem cells to relieve psoriasis-like skin lesions in BALB/c mice

Manuscript number (if known): \_\_\_\_\_

In the interest of transparency, we ask you to disclose all relationships/activities/interests listed below that are related to the content of your manuscript. "Related" means any relation with for-profit or not-for-profit third parties whose interests may be affected by the content of the manuscript. Disclosure represents a commitment to transparency and does not necessarily indicate a bias. If you are in doubt about whether to list a relationship/activity/interest, it is preferable that you do so.

The following questions apply to the author's relationships/activities/interests as they relate to the current manuscript only.

The author's relationships/activities/interests should be defined broadly. For example, if your manuscript pertains to the epidemiology of hypertension, you should declare all relationships with manufacturers of antihypertensive medication, even if that medication is not mentioned in the manuscript.

In item #1 below, report all support for the work reported in this manuscript without time limit. For all other items, the time frame for disclosure is the past 36 months.

|                                                           |                                                                                                                                                                                | Name all entities with whom you have this relationship or indicate none (add rows as needed) | Specifications/Comments (e.g., if payments were made to you or to your institution)                                                               |
|-----------------------------------------------------------|--------------------------------------------------------------------------------------------------------------------------------------------------------------------------------|----------------------------------------------------------------------------------------------|---------------------------------------------------------------------------------------------------------------------------------------------------|
| <b>Time frame: Since the initial planning of the work</b> |                                                                                                                                                                                |                                                                                              |                                                                                                                                                   |
| 1                                                         | All support for the present manuscript (e.g., funding, provision of study materials, medical writing, article processing charges, etc.)<br><b>No time limit for this item.</b> | Hainan Province Clinical Medical Center                                                      |                                                                                                                                                   |
|                                                           |                                                                                                                                                                                | Hainan Natural Science Foundation                                                            | Effects of indigo naturalis and Arnebia on differentiation and barrier function of epidermal stem cells in psoriasis response research (20158342) |
|                                                           |                                                                                                                                                                                |                                                                                              |                                                                                                                                                   |
|                                                           |                                                                                                                                                                                |                                                                                              |                                                                                                                                                   |
|                                                           |                                                                                                                                                                                |                                                                                              |                                                                                                                                                   |
|                                                           |                                                                                                                                                                                |                                                                                              |                                                                                                                                                   |
| <b>Time frame: past 36 months</b>                         |                                                                                                                                                                                |                                                                                              |                                                                                                                                                   |
| 2                                                         | Grants or contracts from any entity (if not indicated in item #1 above).                                                                                                       | None                                                                                         |                                                                                                                                                   |
|                                                           |                                                                                                                                                                                |                                                                                              |                                                                                                                                                   |
| 3                                                         | Royalties or licenses                                                                                                                                                          | None                                                                                         |                                                                                                                                                   |
|                                                           |                                                                                                                                                                                |                                                                                              |                                                                                                                                                   |

|    |                                                                                                              |                                                     |  |
|----|--------------------------------------------------------------------------------------------------------------|-----------------------------------------------------|--|
| 4  | Consulting fees                                                                                              | ___ None                                            |  |
| 5  | Payment or honoraria for lectures, presentations, speakers bureaus, manuscript writing or educational events | ___ None                                            |  |
| 6  | Payment for expert testimony                                                                                 | ___ None                                            |  |
| 7  | Support for attending meetings and/or travel                                                                 | ___ None                                            |  |
| 8  | Patents planned, issued or pending                                                                           | ___ None                                            |  |
| 9  | Participation on a Data Safety Monitoring Board or Advisory Board                                            | ___ None                                            |  |
| 10 | Leadership or fiduciary role in other board, society, committee or advocacy group, paid or unpaid            | ___ None                                            |  |
| 11 | Stock or stock options                                                                                       | ___ None                                            |  |
| 12 | Receipt of equipment, materials, drugs, medical writing, gifts or other services                             | ___ None                                            |  |
| 13 | Other financial or non-financial interests                                                                   | Asia Stem Cell Regenerative Pharmaceutical Co. Ltd. |  |

**Please summarize the above conflict of interest in the following box:**

The author reports that research was supported by Hainan Province Clinical Medical Center and the funding project “Effects of indigo naturalis and Arnebia on differentiation and barrier function of epidermal stem cells in psoriasis response research (Hainan Natural Science Foundation, 20158342)”. The author is from Asia Stem Cell Regenerative Pharmaceutical Co. Ltd.

**Please place an “X” next to the following statement to indicate your agreement:**

**X \_\_\_ I certify that I have answered every question and have not altered the wording of any of the questions on this form.**

## ICMJE DISCLOSURE FORM

Date: 2021/12/30

Your Name: Chen Chen

Manuscript Title: Effects of different concentrations of human umbilical cord mesenchymal stem cells to relieve psoriasis-like skin lesions in BALB/c mice

Manuscript number (if known): \_\_\_\_\_

In the interest of transparency, we ask you to disclose all relationships/activities/interests listed below that are related to the content of your manuscript. "Related" means any relation with for-profit or not-for-profit third parties whose interests may be affected by the content of the manuscript. Disclosure represents a commitment to transparency and does not necessarily indicate a bias. If you are in doubt about whether to list a relationship/activity/interest, it is preferable that you do so.

The following questions apply to the author's relationships/activities/interests as they relate to the current manuscript only.

The author's relationships/activities/interests should be defined broadly. For example, if your manuscript pertains to the epidemiology of hypertension, you should declare all relationships with manufacturers of antihypertensive medication, even if that medication is not mentioned in the manuscript.

In item #1 below, report all support for the work reported in this manuscript without time limit. For all other items, the time frame for disclosure is the past 36 months.

|                                                           |                                                                                                                                                                                | Name all entities with whom you have this relationship or indicate none (add rows as needed) | Specifications/Comments (e.g., if payments were made to you or to your institution)                                                               |
|-----------------------------------------------------------|--------------------------------------------------------------------------------------------------------------------------------------------------------------------------------|----------------------------------------------------------------------------------------------|---------------------------------------------------------------------------------------------------------------------------------------------------|
| <b>Time frame: Since the initial planning of the work</b> |                                                                                                                                                                                |                                                                                              |                                                                                                                                                   |
| 1                                                         | All support for the present manuscript (e.g., funding, provision of study materials, medical writing, article processing charges, etc.)<br><b>No time limit for this item.</b> | Hainan Province Clinical Medical Center                                                      |                                                                                                                                                   |
|                                                           |                                                                                                                                                                                | Hainan Natural Science Foundation                                                            | Effects of indigo naturalis and Arnebia on differentiation and barrier function of epidermal stem cells in psoriasis response research (20158342) |
|                                                           |                                                                                                                                                                                |                                                                                              |                                                                                                                                                   |
|                                                           |                                                                                                                                                                                |                                                                                              |                                                                                                                                                   |
|                                                           |                                                                                                                                                                                |                                                                                              |                                                                                                                                                   |
|                                                           |                                                                                                                                                                                |                                                                                              |                                                                                                                                                   |
| <b>Time frame: past 36 months</b>                         |                                                                                                                                                                                |                                                                                              |                                                                                                                                                   |
| 2                                                         | Grants or contracts from any entity (if not indicated in item #1 above).                                                                                                       | None                                                                                         |                                                                                                                                                   |
|                                                           |                                                                                                                                                                                |                                                                                              |                                                                                                                                                   |
| 3                                                         | Royalties or licenses                                                                                                                                                          | None                                                                                         |                                                                                                                                                   |
|                                                           |                                                                                                                                                                                |                                                                                              |                                                                                                                                                   |



|    |                                                                                                              |                                                     |  |
|----|--------------------------------------------------------------------------------------------------------------|-----------------------------------------------------|--|
| 4  | Consulting fees                                                                                              | ____ None                                           |  |
| 5  | Payment or honoraria for lectures, presentations, speakers bureaus, manuscript writing or educational events | ____ None                                           |  |
| 6  | Payment for expert testimony                                                                                 | ____ None                                           |  |
| 7  | Support for attending meetings and/or travel                                                                 | ____ None                                           |  |
| 8  | Patents planned, issued or pending                                                                           | ____ None                                           |  |
| 9  | Participation on a Data Safety Monitoring Board or Advisory Board                                            | ____ None                                           |  |
| 10 | Leadership or fiduciary role in other board, society, committee or advocacy group, paid or unpaid            | ____ None                                           |  |
| 11 | Stock or stock options                                                                                       | ____ None                                           |  |
| 12 | Receipt of equipment, materials, drugs, medical writing, gifts or other services                             | ____ None                                           |  |
| 13 | Other financial or non-financial interests                                                                   | Asia Stem Cell Regenerative Pharmaceutical Co. Ltd. |  |

**Please summarize the above conflict of interest in the following box:**

The author reports that research was supported by Hainan Province Clinical Medical Center and the funding project “Effects of indigo naturalis and Arnebia on differentiation and barrier function of epidermal stem cells in psoriasis response research (Hainan Natural Science Foundation, 20158342)”. The author is from Asia Stem Cell Regenerative Pharmaceutical Co. Ltd.

**Please place an “X” next to the following statement to indicate your agreement:**

**I certify that I have answered every question and have not altered the wording of any of the questions on this form.**

## ICMJE DISCLOSURE FORM

Date: 2021/12/30

Your Name: Danpeng Shen

Manuscript Title: Effects of different concentrations of human umbilical cord mesenchymal stem cells to relieve psoriasis-like skin lesions in BALB/c mice

Manuscript number (if known): \_\_\_\_\_

In the interest of transparency, we ask you to disclose all relationships/activities/interests listed below that are related to the content of your manuscript. "Related" means any relation with for-profit or not-for-profit third parties whose interests may be affected by the content of the manuscript. Disclosure represents a commitment to transparency and does not necessarily indicate a bias. If you are in doubt about whether to list a relationship/activity/interest, it is preferable that you do so.

The following questions apply to the author's relationships/activities/interests as they relate to the current manuscript only.

The author's relationships/activities/interests should be defined broadly. For example, if your manuscript pertains to the epidemiology of hypertension, you should declare all relationships with manufacturers of antihypertensive medication, even if that medication is not mentioned in the manuscript.

In item #1 below, report all support for the work reported in this manuscript without time limit. For all other items, the time frame for disclosure is the past 36 months.

|                                                           |                                                                                                                                                                                | Name all entities with whom you have this relationship or indicate none (add rows as needed) | Specifications/Comments (e.g., if payments were made to you or to your institution)                                                               |
|-----------------------------------------------------------|--------------------------------------------------------------------------------------------------------------------------------------------------------------------------------|----------------------------------------------------------------------------------------------|---------------------------------------------------------------------------------------------------------------------------------------------------|
| <b>Time frame: Since the initial planning of the work</b> |                                                                                                                                                                                |                                                                                              |                                                                                                                                                   |
| 1                                                         | All support for the present manuscript (e.g., funding, provision of study materials, medical writing, article processing charges, etc.)<br><b>No time limit for this item.</b> | Hainan Province Clinical Medical Center                                                      |                                                                                                                                                   |
|                                                           |                                                                                                                                                                                | Hainan Natural Science Foundation                                                            | Effects of indigo naturalis and Arnebia on differentiation and barrier function of epidermal stem cells in psoriasis response research (20158342) |
|                                                           |                                                                                                                                                                                |                                                                                              |                                                                                                                                                   |
|                                                           |                                                                                                                                                                                |                                                                                              |                                                                                                                                                   |
|                                                           |                                                                                                                                                                                |                                                                                              |                                                                                                                                                   |
|                                                           |                                                                                                                                                                                |                                                                                              |                                                                                                                                                   |
| <b>Time frame: past 36 months</b>                         |                                                                                                                                                                                |                                                                                              |                                                                                                                                                   |
| 2                                                         | Grants or contracts from any entity (if not indicated in item #1 above).                                                                                                       | None                                                                                         |                                                                                                                                                   |
|                                                           |                                                                                                                                                                                |                                                                                              |                                                                                                                                                   |
| 3                                                         | Royalties or licenses                                                                                                                                                          | None                                                                                         |                                                                                                                                                   |
|                                                           |                                                                                                                                                                                |                                                                                              |                                                                                                                                                   |

|    |                                                                                                              |                                                     |  |
|----|--------------------------------------------------------------------------------------------------------------|-----------------------------------------------------|--|
| 4  | Consulting fees                                                                                              | ____ None                                           |  |
| 5  | Payment or honoraria for lectures, presentations, speakers bureaus, manuscript writing or educational events | ____ None                                           |  |
| 6  | Payment for expert testimony                                                                                 | ____ None                                           |  |
| 7  | Support for attending meetings and/or travel                                                                 | ____ None                                           |  |
| 8  | Patents planned, issued or pending                                                                           | ____ None                                           |  |
| 9  | Participation on a Data Safety Monitoring Board or Advisory Board                                            | ____ None                                           |  |
| 10 | Leadership or fiduciary role in other board, society, committee or advocacy group, paid or unpaid            | ____ None                                           |  |
| 11 | Stock or stock options                                                                                       | ____ None                                           |  |
| 12 | Receipt of equipment, materials, drugs, medical writing, gifts or other services                             | ____ None                                           |  |
| 13 | Other financial or non-financial interests                                                                   | Asia Stem Cell Regenerative Pharmaceutical Co. Ltd. |  |

**Please summarize the above conflict of interest in the following box:**

The author reports that research was supported by Hainan Province Clinical Medical Center and the funding project “Effects of indigo naturalis and Arnebia on differentiation and barrier function of epidermal stem cells in psoriasis response research (Hainan Natural Science Foundation, 20158342)”. The author is from Asia Stem Cell Regenerative Pharmaceutical Co. Ltd.

**Please place an “X” next to the following statement to indicate your agreement:**

**X \_\_\_ I certify that I have answered every question and have not altered the wording of any of the questions on this form.**

## ICMJE DISCLOSURE FORM

Date: 2021/12/30

Your Name: Fan Xie

Manuscript Title: Effects of different concentrations of human umbilical cord mesenchymal stem cells to relieve psoriasis-like skin lesions in BALB/c mice

Manuscript number (if known): \_\_\_\_\_

In the interest of transparency, we ask you to disclose all relationships/activities/interests listed below that are related to the content of your manuscript. "Related" means any relation with for-profit or not-for-profit third parties whose interests may be affected by the content of the manuscript. Disclosure represents a commitment to transparency and does not necessarily indicate a bias. If you are in doubt about whether to list a relationship/activity/interest, it is preferable that you do so.

The following questions apply to the author's relationships/activities/interests as they relate to the current manuscript only.

The author's relationships/activities/interests should be defined broadly. For example, if your manuscript pertains to the epidemiology of hypertension, you should declare all relationships with manufacturers of antihypertensive medication, even if that medication is not mentioned in the manuscript.

In item #1 below, report all support for the work reported in this manuscript without time limit. For all other items, the time frame for disclosure is the past 36 months.

|                                                           |                                                                                                                                                                                | Name all entities with whom you have this relationship or indicate none (add rows as needed) | Specifications/Comments (e.g., if payments were made to you or to your institution)                                                               |
|-----------------------------------------------------------|--------------------------------------------------------------------------------------------------------------------------------------------------------------------------------|----------------------------------------------------------------------------------------------|---------------------------------------------------------------------------------------------------------------------------------------------------|
| <b>Time frame: Since the initial planning of the work</b> |                                                                                                                                                                                |                                                                                              |                                                                                                                                                   |
| 1                                                         | All support for the present manuscript (e.g., funding, provision of study materials, medical writing, article processing charges, etc.)<br><b>No time limit for this item.</b> | Hainan Province Clinical Medical Center                                                      |                                                                                                                                                   |
|                                                           |                                                                                                                                                                                | Hainan Natural Science Foundation                                                            | Effects of indigo naturalis and Arnebia on differentiation and barrier function of epidermal stem cells in psoriasis response research (20158342) |
|                                                           |                                                                                                                                                                                |                                                                                              |                                                                                                                                                   |
|                                                           |                                                                                                                                                                                |                                                                                              |                                                                                                                                                   |
|                                                           |                                                                                                                                                                                |                                                                                              |                                                                                                                                                   |
|                                                           |                                                                                                                                                                                |                                                                                              |                                                                                                                                                   |
| <b>Time frame: past 36 months</b>                         |                                                                                                                                                                                |                                                                                              |                                                                                                                                                   |
| 2                                                         | Grants or contracts from any entity (if not indicated in item #1 above).                                                                                                       | None                                                                                         |                                                                                                                                                   |
|                                                           |                                                                                                                                                                                |                                                                                              |                                                                                                                                                   |
| 3                                                         | Royalties or licenses                                                                                                                                                          | None                                                                                         |                                                                                                                                                   |
|                                                           |                                                                                                                                                                                |                                                                                              |                                                                                                                                                   |

|    |                                                                                                              |                                                     |  |
|----|--------------------------------------------------------------------------------------------------------------|-----------------------------------------------------|--|
| 4  | Consulting fees                                                                                              | ___ None                                            |  |
| 5  | Payment or honoraria for lectures, presentations, speakers bureaus, manuscript writing or educational events | ___ None                                            |  |
| 6  | Payment for expert testimony                                                                                 | ___ None                                            |  |
| 7  | Support for attending meetings and/or travel                                                                 | ___ None                                            |  |
| 8  | Patents planned, issued or pending                                                                           | ___ None                                            |  |
| 9  | Participation on a Data Safety Monitoring Board or Advisory Board                                            | ___ None                                            |  |
| 10 | Leadership or fiduciary role in other board, society, committee or advocacy group, paid or unpaid            | ___ None                                            |  |
| 11 | Stock or stock options                                                                                       | ___ None                                            |  |
| 12 | Receipt of equipment, materials, drugs, medical writing, gifts or other services                             | ___ None                                            |  |
| 13 | Other financial or non-financial interests                                                                   | Asia Stem Cell Regenerative Pharmaceutical Co. Ltd. |  |

**Please summarize the above conflict of interest in the following box:**

The author reports that research was supported by Hainan Province Clinical Medical Center and the funding project “Effects of indigo naturalis and Arnebia on differentiation and barrier function of epidermal stem cells in psoriasis response research (Hainan Natural Science Foundation, 20158342)”. The author is from Asia Stem Cell Regenerative Pharmaceutical Co. Ltd.

**Please place an “X” next to the following statement to indicate your agreement:**

**X \_\_\_ I certify that I have answered every question and have not altered the wording of any of the questions on this form.**

## ICMJE DISCLOSURE FORM

Date: 2021/12/30

Your Name: Hongpeng Zhang

Manuscript Title: Effects of different concentrations of human umbilical cord mesenchymal stem cells to relieve psoriasis-like skin lesions in BALB/c mice

Manuscript number (if known): \_\_\_\_\_

In the interest of transparency, we ask you to disclose all relationships/activities/interests listed below that are related to the content of your manuscript. "Related" means any relation with for-profit or not-for-profit third parties whose interests may be affected by the content of the manuscript. Disclosure represents a commitment to transparency and does not necessarily indicate a bias. If you are in doubt about whether to list a relationship/activity/interest, it is preferable that you do so.

The following questions apply to the author's relationships/activities/interests as they relate to the current manuscript only.

The author's relationships/activities/interests should be defined broadly. For example, if your manuscript pertains to the epidemiology of hypertension, you should declare all relationships with manufacturers of antihypertensive medication, even if that medication is not mentioned in the manuscript.

In item #1 below, report all support for the work reported in this manuscript without time limit. For all other items, the time frame for disclosure is the past 36 months.

|                                                           |                                                                                                                                                                                | Name all entities with whom you have this relationship or indicate none (add rows as needed) | Specifications/Comments (e.g., if payments were made to you or to your institution)                                                               |
|-----------------------------------------------------------|--------------------------------------------------------------------------------------------------------------------------------------------------------------------------------|----------------------------------------------------------------------------------------------|---------------------------------------------------------------------------------------------------------------------------------------------------|
| <b>Time frame: Since the initial planning of the work</b> |                                                                                                                                                                                |                                                                                              |                                                                                                                                                   |
| 1                                                         | All support for the present manuscript (e.g., funding, provision of study materials, medical writing, article processing charges, etc.)<br><b>No time limit for this item.</b> | Hainan Province Clinical Medical Center                                                      |                                                                                                                                                   |
|                                                           |                                                                                                                                                                                | Hainan Natural Science Foundation                                                            | Effects of indigo naturalis and Arnebia on differentiation and barrier function of epidermal stem cells in psoriasis response research (20158342) |
|                                                           |                                                                                                                                                                                |                                                                                              |                                                                                                                                                   |
|                                                           |                                                                                                                                                                                |                                                                                              |                                                                                                                                                   |
|                                                           |                                                                                                                                                                                |                                                                                              |                                                                                                                                                   |
|                                                           |                                                                                                                                                                                |                                                                                              |                                                                                                                                                   |
| <b>Time frame: past 36 months</b>                         |                                                                                                                                                                                |                                                                                              |                                                                                                                                                   |
| 2                                                         | Grants or contracts from any entity (if not indicated in item #1 above).                                                                                                       | None                                                                                         |                                                                                                                                                   |
|                                                           |                                                                                                                                                                                |                                                                                              |                                                                                                                                                   |
| 3                                                         | Royalties or licenses                                                                                                                                                          | None                                                                                         |                                                                                                                                                   |
|                                                           |                                                                                                                                                                                |                                                                                              |                                                                                                                                                   |

|    |                                                                                                              |                                                     |  |
|----|--------------------------------------------------------------------------------------------------------------|-----------------------------------------------------|--|
| 4  | Consulting fees                                                                                              | ____ None                                           |  |
| 5  | Payment or honoraria for lectures, presentations, speakers bureaus, manuscript writing or educational events | ____ None                                           |  |
| 6  | Payment for expert testimony                                                                                 | ____ None                                           |  |
| 7  | Support for attending meetings and/or travel                                                                 | ____ None                                           |  |
| 8  | Patents planned, issued or pending                                                                           | ____ None                                           |  |
| 9  | Participation on a Data Safety Monitoring Board or Advisory Board                                            | ____ None                                           |  |
| 10 | Leadership or fiduciary role in other board, society, committee or advocacy group, paid or unpaid            | ____ None                                           |  |
| 11 | Stock or stock options                                                                                       | ____ None                                           |  |
| 12 | Receipt of equipment, materials, drugs, medical writing, gifts or other services                             | ____ None                                           |  |
| 13 | Other financial or non-financial interests                                                                   | Asia Stem Cell Regenerative Pharmaceutical Co. Ltd. |  |

**Please summarize the above conflict of interest in the following box:**

The author reports that research was supported by Hainan Province Clinical Medical Center and the funding project “Effects of indigo naturalis and Arnebia on differentiation and barrier function of epidermal stem cells in psoriasis response research (Hainan Natural Science Foundation, 20158342)”. The author is from Asia Stem Cell Regenerative Pharmaceutical Co. Ltd.

**Please place an “X” next to the following statement to indicate your agreement:**

**X  I certify that I have answered every question and have not altered the wording of any of the questions on this form.**

## ICMJE DISCLOSURE FORM

Date: 2021/12/30

Your Name: Jie Yang

Manuscript Title: Effects of different concentrations of human umbilical cord mesenchymal stem cells to relieve psoriasis-like skin lesions in BALB/c mice

Manuscript number (if known): \_\_\_\_\_

In the interest of transparency, we ask you to disclose all relationships/activities/interests listed below that are related to the content of your manuscript. "Related" means any relation with for-profit or not-for-profit third parties whose interests may be affected by the content of the manuscript. Disclosure represents a commitment to transparency and does not necessarily indicate a bias. If you are in doubt about whether to list a relationship/activity/interest, it is preferable that you do so.

The following questions apply to the author's relationships/activities/interests as they relate to the current manuscript only.

The author's relationships/activities/interests should be defined broadly. For example, if your manuscript pertains to the epidemiology of hypertension, you should declare all relationships with manufacturers of antihypertensive medication, even if that medication is not mentioned in the manuscript.

In item #1 below, report all support for the work reported in this manuscript without time limit. For all other items, the time frame for disclosure is the past 36 months.

|                                                           |                                                                                                                                                                                | Name all entities with whom you have this relationship or indicate none (add rows as needed) | Specifications/Comments (e.g., if payments were made to you or to your institution)                                                               |
|-----------------------------------------------------------|--------------------------------------------------------------------------------------------------------------------------------------------------------------------------------|----------------------------------------------------------------------------------------------|---------------------------------------------------------------------------------------------------------------------------------------------------|
| <b>Time frame: Since the initial planning of the work</b> |                                                                                                                                                                                |                                                                                              |                                                                                                                                                   |
| 1                                                         | All support for the present manuscript (e.g., funding, provision of study materials, medical writing, article processing charges, etc.)<br><b>No time limit for this item.</b> | Hainan Province Clinical Medical Center                                                      |                                                                                                                                                   |
|                                                           |                                                                                                                                                                                | Hainan Natural Science Foundation                                                            | Effects of indigo naturalis and Arnebia on differentiation and barrier function of epidermal stem cells in psoriasis response research (20158342) |
|                                                           |                                                                                                                                                                                |                                                                                              |                                                                                                                                                   |
|                                                           |                                                                                                                                                                                |                                                                                              |                                                                                                                                                   |
|                                                           |                                                                                                                                                                                |                                                                                              |                                                                                                                                                   |
|                                                           |                                                                                                                                                                                |                                                                                              |                                                                                                                                                   |
| <b>Time frame: past 36 months</b>                         |                                                                                                                                                                                |                                                                                              |                                                                                                                                                   |
| 2                                                         | Grants or contracts from any entity (if not indicated in item #1 above).                                                                                                       | None                                                                                         |                                                                                                                                                   |
|                                                           |                                                                                                                                                                                |                                                                                              |                                                                                                                                                   |
| 3                                                         | Royalties or licenses                                                                                                                                                          | None                                                                                         |                                                                                                                                                   |
|                                                           |                                                                                                                                                                                |                                                                                              |                                                                                                                                                   |



|    |                                                                                                              |           |  |
|----|--------------------------------------------------------------------------------------------------------------|-----------|--|
|    |                                                                                                              |           |  |
| 4  | Consulting fees                                                                                              | ____ None |  |
|    |                                                                                                              |           |  |
|    |                                                                                                              |           |  |
| 5  | Payment or honoraria for lectures, presentations, speakers bureaus, manuscript writing or educational events | ____ None |  |
|    |                                                                                                              |           |  |
|    |                                                                                                              |           |  |
| 6  | Payment for expert testimony                                                                                 | ____ None |  |
|    |                                                                                                              |           |  |
|    |                                                                                                              |           |  |
| 7  | Support for attending meetings and/or travel                                                                 | ____ None |  |
|    |                                                                                                              |           |  |
|    |                                                                                                              |           |  |
| 8  | Patents planned, issued or pending                                                                           | ____ None |  |
|    |                                                                                                              |           |  |
|    |                                                                                                              |           |  |
| 9  | Participation on a Data Safety Monitoring Board or Advisory Board                                            | ____ None |  |
|    |                                                                                                              |           |  |
|    |                                                                                                              |           |  |
| 10 | Leadership or fiduciary role in other board, society, committee or advocacy group, paid or unpaid            | ____ None |  |
|    |                                                                                                              |           |  |
|    |                                                                                                              |           |  |
| 11 | Stock or stock options                                                                                       | ____ None |  |
|    |                                                                                                              |           |  |
|    |                                                                                                              |           |  |
| 12 | Receipt of equipment, materials, drugs, medical writing, gifts or other services                             | ____ None |  |
|    |                                                                                                              |           |  |
|    |                                                                                                              |           |  |
| 13 | Other financial or non-financial interests                                                                   | ____ None |  |
|    |                                                                                                              |           |  |
|    |                                                                                                              |           |  |

**Please summarize the above conflict of interest in the following box:**

The author reports that research was supported by Hainan Province Clinical Medical Center and the funding project “Effects of indigo naturalis and Arnebia on differentiation and barrier function of epidermal stem cells in psoriasis response research (Hainan Natural Science Foundation, 20158342)”.

**Please place an “X” next to the following statement to indicate your agreement:**

**X** I certify that I have answered every question and have not altered the wording of any of the questions on this form.



## ICMJE DISCLOSURE FORM

Date: 2021/12/30

Your Name: Hao Wang

Manuscript Title: Effects of different concentrations of human umbilical cord mesenchymal stem cells to relieve psoriasis-like skin lesions in BALB/c mice

Manuscript number (if known): \_\_\_\_\_

In the interest of transparency, we ask you to disclose all relationships/activities/interests listed below that are related to the content of your manuscript. "Related" means any relation with for-profit or not-for-profit third parties whose interests may be affected by the content of the manuscript. Disclosure represents a commitment to transparency and does not necessarily indicate a bias. If you are in doubt about whether to list a relationship/activity/interest, it is preferable that you do so.

The following questions apply to the author's relationships/activities/interests as they relate to the current manuscript only.

The author's relationships/activities/interests should be defined broadly. For example, if your manuscript pertains to the epidemiology of hypertension, you should declare all relationships with manufacturers of antihypertensive medication, even if that medication is not mentioned in the manuscript.

In item #1 below, report all support for the work reported in this manuscript without time limit. For all other items, the time frame for disclosure is the past 36 months.

|                                                           |                                                                                                                                                                                | Name all entities with whom you have this relationship or indicate none (add rows as needed) | Specifications/Comments (e.g., if payments were made to you or to your institution)                                                               |
|-----------------------------------------------------------|--------------------------------------------------------------------------------------------------------------------------------------------------------------------------------|----------------------------------------------------------------------------------------------|---------------------------------------------------------------------------------------------------------------------------------------------------|
| <b>Time frame: Since the initial planning of the work</b> |                                                                                                                                                                                |                                                                                              |                                                                                                                                                   |
| 1                                                         | All support for the present manuscript (e.g., funding, provision of study materials, medical writing, article processing charges, etc.)<br><b>No time limit for this item.</b> | Hainan Province Clinical Medical Center                                                      |                                                                                                                                                   |
|                                                           |                                                                                                                                                                                | Hainan Natural Science Foundation                                                            | Effects of indigo naturalis and Arnebia on differentiation and barrier function of epidermal stem cells in psoriasis response research (20158342) |
|                                                           |                                                                                                                                                                                |                                                                                              |                                                                                                                                                   |
|                                                           |                                                                                                                                                                                |                                                                                              |                                                                                                                                                   |
|                                                           |                                                                                                                                                                                |                                                                                              |                                                                                                                                                   |
|                                                           |                                                                                                                                                                                |                                                                                              |                                                                                                                                                   |
| <b>Time frame: past 36 months</b>                         |                                                                                                                                                                                |                                                                                              |                                                                                                                                                   |
| 2                                                         | Grants or contracts from any entity (if not indicated in item #1 above).                                                                                                       | ___ None                                                                                     |                                                                                                                                                   |
|                                                           |                                                                                                                                                                                |                                                                                              |                                                                                                                                                   |
| 3                                                         | Royalties or licenses                                                                                                                                                          | ___ None                                                                                     |                                                                                                                                                   |
|                                                           |                                                                                                                                                                                |                                                                                              |                                                                                                                                                   |

|    |                                                                                                              |                                                     |  |
|----|--------------------------------------------------------------------------------------------------------------|-----------------------------------------------------|--|
| 4  | Consulting fees                                                                                              | ___ None                                            |  |
| 5  | Payment or honoraria for lectures, presentations, speakers bureaus, manuscript writing or educational events | ___ None                                            |  |
| 6  | Payment for expert testimony                                                                                 | ___ None                                            |  |
| 7  | Support for attending meetings and/or travel                                                                 | ___ None                                            |  |
| 8  | Patents planned, issued or pending                                                                           | ___ None                                            |  |
| 9  | Participation on a Data Safety Monitoring Board or Advisory Board                                            | ___ None                                            |  |
| 10 | Leadership or fiduciary role in other board, society, committee or advocacy group, paid or unpaid            | ___ None                                            |  |
| 11 | Stock or stock options                                                                                       | ___ None                                            |  |
| 12 | Receipt of equipment, materials, drugs, medical writing, gifts or other services                             | ___ None                                            |  |
| 13 | Other financial or non-financial interests                                                                   | Asia Stem Cell Regenerative Pharmaceutical Co. Ltd. |  |

**Please summarize the above conflict of interest in the following box:**

The author reports that research was supported by Hainan Province Clinical Medical Center and the funding project “Effects of indigo naturalis and Arnebia on differentiation and barrier function of epidermal stem cells in psoriasis response research (Hainan Natural Science Foundation, 20158342)”. The author is from Asia Stem Cell Regenerative Pharmaceutical Co. Ltd.

**Please place an “X” next to the following statement to indicate your agreement:**

**X  I certify that I have answered every question and have not altered the wording of any of the questions on this form.**
